# Supplementary material
Source: PubMed Central journal article supplement (PMC5576735)
Supplement: NIHMS880293-supplement-1.pdf [file NIHMS880293-supplement-1.pdf]

## Supplemental Figure 1

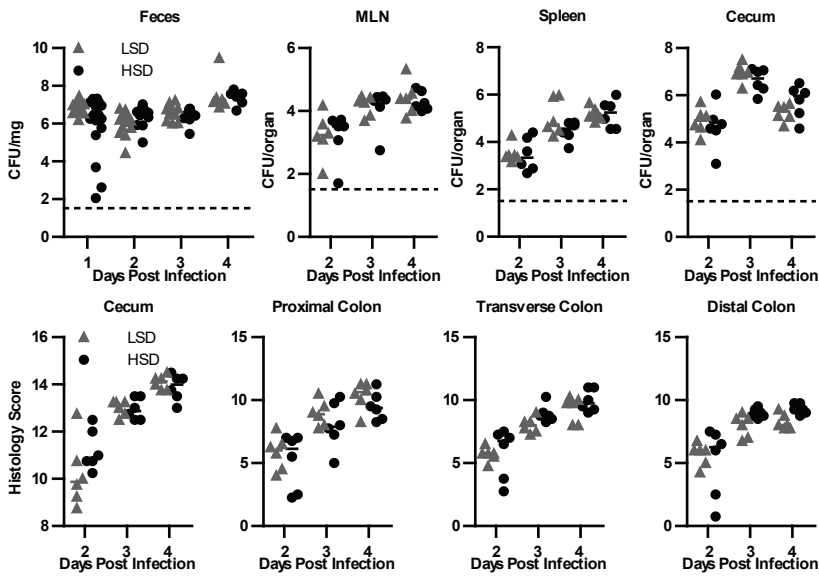

**Supplemental Figure 1. *S. typhimurium* CFU burdens and histology scores.** Upper panels display number of colony forming units per mg of feces or per organ; dashed line indicates limit of detection. Lower panels display break-out histology scores that were combined to form Fig. 5B.

## Supplemental Figure 2

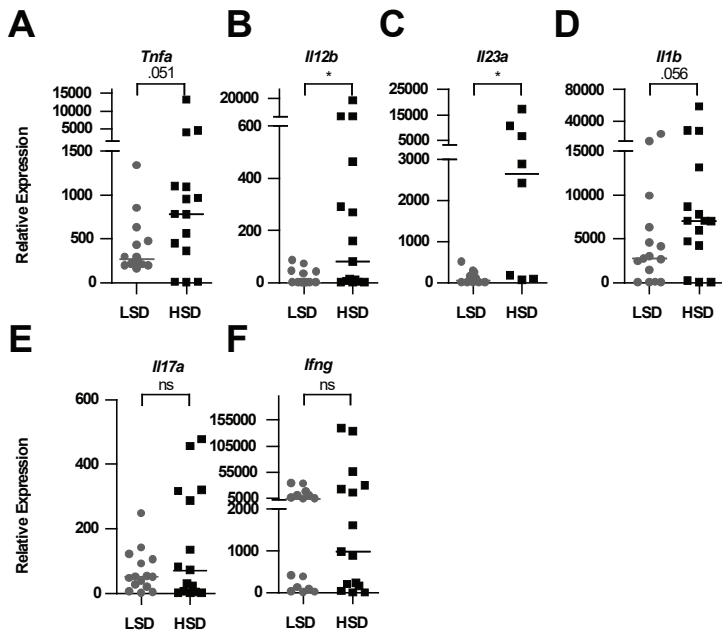

**Supplemental Figure 2. Effect of a HSD on mRNA expression in caspase-1/11-deficient mice.** (A-F) qPCR analysis of colonic mRNA from mice infected with *S. typhimurium* for 3 days. P values determined by Mann Whitney nonparametric tests. Data are combined from 2 replicate experiments, except (C), the data of which are from the second experiment only.
